# Supplementary material for: Nutritional Biomarkers for the Prediction of Response to Anti-TNF-α Therapy in Crohn’s Disease: New Tools for New Approaches
Source: MDPI journal article supplement (doi:10.3390/nu16020280), 2024-01-17
Supplement: s1 [file s1]

## Supplementary Material Table S1

Food frequency questionnaire

Name & surname: \_\_\_\_\_

ID subject: \_\_\_\_\_

Date: \_\_\_\_\_

Day of the week: \_\_\_\_\_

### DAY 1

**Before breakfast:**

| TIMES | PLACE | DESCRIPTION OF BEVERAGES / FOODS<br>AND TYPE OF PREPARATION | QUANTITY |
|-------|-------|-------------------------------------------------------------|----------|
|       |       |                                                             |          |
|       |       |                                                             |          |
|       |       |                                                             |          |
|       |       |                                                             |          |
|       |       |                                                             |          |

**Breakfast:**

| TIMES | PLACE | DESCRIPTION OF BEVERAGES / FOODS<br>AND TYPE OF PREPARATION | QUANTITY |
|-------|-------|-------------------------------------------------------------|----------|
|       |       |                                                             |          |
|       |       |                                                             |          |
|       |       |                                                             |          |
|       |       |                                                             |          |
|       |       |                                                             |          |
|       |       |                                                             |          |
|       |       |                                                             |          |
|       |       |                                                             |          |
|       |       |                                                             |          |

**Morning Snack:**

| TIMES | PLACE | DESCRIPTION OF BEVERAGES / FOODS AND<br>TYPE OF PREPARATION | QUANTITY |
|-------|-------|-------------------------------------------------------------|----------|
|       |       |                                                             |          |
|       |       |                                                             |          |
|       |       |                                                             |          |
|       |       |                                                             |          |
|       |       |                                                             |          |

**Lunch:**

| TIMES | PLACE | DESCRIPTION OF BEVERAGES / FOODS<br>AND TYPE OF PREPARATION | QUANTITY |
|-------|-------|-------------------------------------------------------------|----------|
|       |       |                                                             |          |
|       |       |                                                             |          |
|       |       |                                                             |          |
|       |       |                                                             |          |
|       |       |                                                             |          |
|       |       |                                                             |          |
|       |       |                                                             |          |
|       |       |                                                             |          |

**Afternoon snack:**

| TIMES | PLACE | DESCRIPTION OF BEVERAGES / FOODS<br>AND TYPE OF PREPARATION | QUANTITY |
|-------|-------|-------------------------------------------------------------|----------|
|       |       |                                                             |          |
|       |       |                                                             |          |
|       |       |                                                             |          |
|       |       |                                                             |          |
|       |       |                                                             |          |

**Dinner:**

| TIMES | PLACE | DESCRIPTION OF BEVERAGES / FOODS<br>AND TYPE OF PREPARATION | QUANTITY |
|-------|-------|-------------------------------------------------------------|----------|
|       |       |                                                             |          |
|       |       |                                                             |          |
|       |       |                                                             |          |
|       |       |                                                             |          |
|       |       |                                                             |          |
|       |       |                                                             |          |
|       |       |                                                             |          |
|       |       |                                                             |          |

**After dinner:**

| TIMES | PLACE | DESCRIPTION OF BEVERAGES / FOODS<br>AND TYPE OF PREPARATION | QUANTITY |
|-------|-------|-------------------------------------------------------------|----------|
|       |       |                                                             |          |
|       |       |                                                             |          |
|       |       |                                                             |          |
|       |       |                                                             |          |
|       |       |                                                             |          |

**During the night:**

| TIMES | PLACE | DESCRIPTION OF BEVERAGES / FOODS<br>AND TYPE OF PREPARATION | QUANTITY |
|-------|-------|-------------------------------------------------------------|----------|
|       |       |                                                             |          |
|       |       |                                                             |          |
|       |       |                                                             |          |
|       |       |                                                             |          |

---

**Comments (e.g. recipes)**

---

---

---

---

---

---

---

The food frequency questionnaire is repeated in the same way for all days of the week.
