# Supplementary material for: Nutritional Biomarkers for the Prediction of Response to Anti-TNF-α Therapy in Crohn’s Disease: New Tools for New Approaches
Source: MDPI journal article supplement (doi:10.3390/nu16020280), 2024-01-17
Supplement: s1 [file s1]

## Supplementary Figures

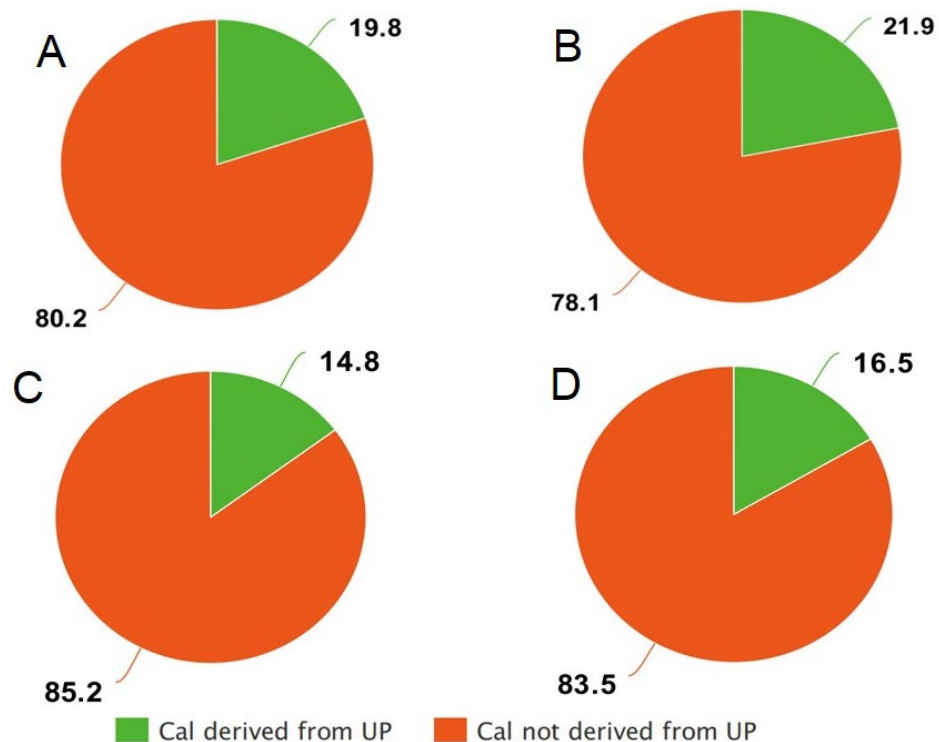

**Figure S1.** Percentage of calories derived or not from ultra-processed (UP) foods in CD-A at V3 (A), CD-R at V3 (B), CD-A at V1 (C), and CD-R at V1 (D).

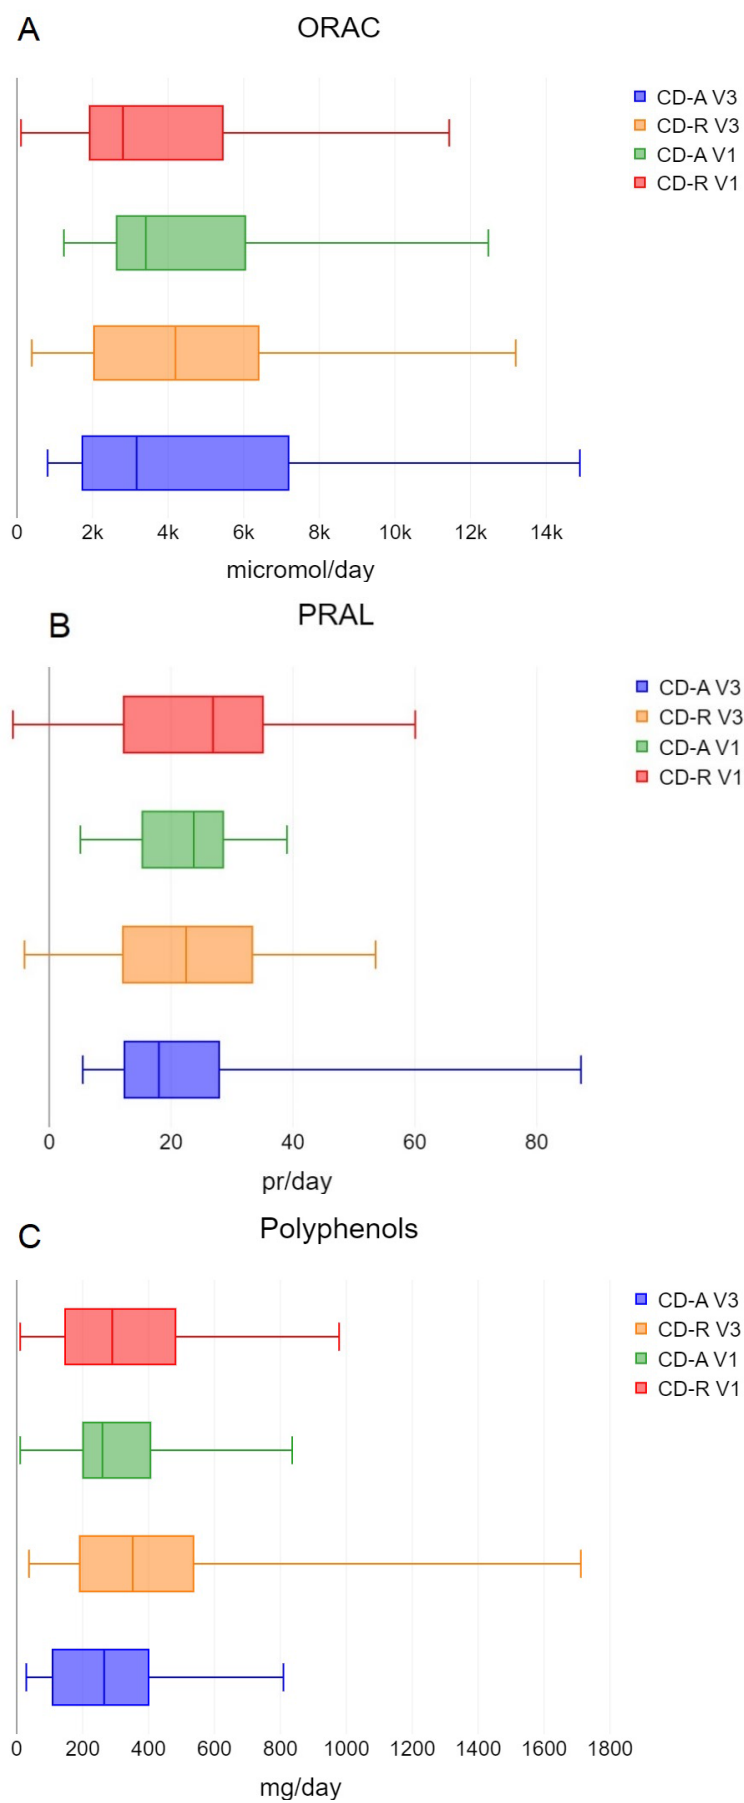

**Figure S2.** ORAC (A), PRAL (B), and total Polyphenols (C) intake.
